# Supplementary material for: Combination of Creatinine with Inflammatory Biomarkers (PCT, CRP, hsCRP) for Predicting Postoperative ICU Admissions for Elderly Patients
Source: Springer Nature journal article supplement (doi:10.1007/s12325-024-02874-1), 2024-05-14
Supplement: MOESM1 [file 27090682]

## **Combination of creatinine with inflammatory biomarkers (PCT, CRP, hsCRP) for predicting postoperative ICU admission for elderly patients**

Yali Chen <sup>1, 2, #</sup>, Yi Teng <sup>1, 2, #</sup>, Xiran Peng <sup>1, 2</sup>, Tao Zhu <sup>1, 2</sup>, Juan Liu <sup>1, 2</sup>,  
Mengchan Ou <sup>1, 2, \*</sup>, Xuechao Hao <sup>1, 2, \*</sup>

<sup>1</sup> Department of Anesthesiology, West China Hospital, Sichuan University

<sup>2</sup> Research Unit for Perioperative Stress Assessment and Clinical Decision, Chinese Academy of Medical Sciences (2018RU012), West China Hospital, Sichuan University

# These authors contributed equally to this work.

\* Corresponding Author:

Dr. Mengchan Ou

Department of Anesthesiology, West China Hospital of Sichuan University, Chengdu, China

Research Unit for Perioperative Stress Assessment and Clinical Decision, Chinese Academy of Medical Sciences (2018RU012), West China Hospital, Sichuan University

Email: [oumengchan@foxmail.com](mailto:oumengchan@foxmail.com)

Dr. Xuechao Hao

Department of Anesthesiology, West China Hospital of Sichuan University, Chengdu, China

Research Unit for Perioperative Stress Assessment and Clinical Decision, Chinese Academy of Medical Sciences (2018RU012), West China Hospital, Sichuan University

Email: [aneshxc@163.com](mailto:aneshxc@163.com)

## Supplementary materials

**Supplementary table 1.** The incidence of complications within 30 days after surgery (n = 413).

| <b>Variable</b>                  | <b>Value</b> |
|----------------------------------|--------------|
| Complications $\geq$ CDC grade 3 | 22 (5.33%)   |
| Major complications              | 120 (29.06%) |
| Mortality                        | 1 (0.24%)    |
| ICU admission                    | 10 (2.42%)   |
| Cardiovascular events            | 14 (3.39%)   |
| AKI                              | 7 (1.69%)    |
| POD                              | 10 (2.42%)   |
| Infection                        | 96 (23.24%)  |

Values are expressed as numbers (percent).

AKI, Acute kidney injury; CDC, Clavien-Dindo Classification; ICU, intensive care unit; POD, postoperative delirium.

**Supplementary table 2.** The clinical characteristics between the positive and negative patients with Complications  $\geq$  CDC grade 3.

| <b>Variable</b>            | <b>Positive patients<br/>(n = 22)</b> | <b>Negative patients<br/>(n = 391)</b> | <b>P value</b> |
|----------------------------|---------------------------------------|----------------------------------------|----------------|
| <b>Characteristics</b>     |                                       |                                        |                |
| Age (years)                | 71.73 $\pm$ 4.1                       | 71.57 $\pm$ 5.2                        | 0.364          |
| Sex                        |                                       |                                        | 0.175          |
| Male                       | 17 (77.27%)                           | 238 (60.87%)                           |                |
| Female                     | 5 (22.73%)                            | 153 (39.13%)                           |                |
| Height (cm)                | 161.4 $\pm$ 6.5                       | 160.8 $\pm$ 8.3                        | 0.129          |
| Weight (kg)                | 56.9 $\pm$ 8.7                        | 59.8 $\pm$ 10.0                        | 0.259          |
| BMI                        | 21.8 $\pm$ 2.4                        | 23.1 $\pm$ 3.3                         | 0.095          |
| Current or recent smoker   | 3 (13.64%)                            | 60 (15.35%)                            | 1.000          |
| <b>Frailty</b>             |                                       |                                        | 0.070          |
| I                          | 17 (77.27%)                           | 334 (85.42%)                           |                |
| II                         | 3 (13.64%)                            | 20 (5.12%)                             |                |
| III                        | 0 (0)                                 | 7 (1.79%)                              |                |
| IV                         | 1 (4.55%)                             | 2 (0.51%)                              |                |
| V                          | 1 (4.55%)                             | 6 (1.53%)                              |                |
| VI                         | 0 (0)                                 | 22 (5.63%)                             |                |
| Hypertension               |                                       |                                        | 0.736          |
| I                          | 3 (13.64%)                            | 51 (13.04%)                            |                |
| II                         | 4 (18.18%)                            | 60 (15.35%)                            |                |
| III                        | 1 (4.55%)                             | 41 (10.49%)                            |                |
| Ischaemic heart disease    | 3 (13.64%)                            | 25 (6.39%)                             | 0.180          |
| Arrhythmias                | 2 (9.09%)                             | 15 (3.84%)                             | 0.227          |
| Valvular heart disease     | 0 (0)                                 | 7 (1.79%)                              | 1.000          |
| Diabetes mellitus          | 10 (45.46%)                           | 151 (38.62%)                           | 0.522          |
| COPD                       | 3 (13.64%)                            | 11 (2.81%)                             | <b>0.033</b>   |
| Cerebrovascular disease    | 1 (4.55%)                             | 8 (2.05%)                              | 0.392          |
| <b>ASA physical status</b> |                                       |                                        | 0.401          |
| II                         | 8 (36.36%)                            | 178 (4.52%)                            |                |
| III                        | 14 (63.64%)                           | 213 (54.48%)                           |                |

|                                      |             |              |                   |
|--------------------------------------|-------------|--------------|-------------------|
| <b>NYHA cardiac functional class</b> |             |              | 0.315             |
| 1                                    | 11 (50.00%) | 239 (61.13%) |                   |
| 2                                    | 10 (45.45%) | 143 (36.57%) |                   |
| 3                                    | 1 (4.55%)   | 9 (2.30%)    |                   |
| <b>Motion equivalent</b>             |             |              | 0.213             |
| < 3 MET                              | 5 (22.72%)  | 51 (13.04%)  |                   |
| 3–6 MET                              | 16 (72.73%) | 277 (70.84%) |                   |
| > 6 MET                              | 1 (4.55%)   | 63 (16.11%)  |                   |
| <b>Type of surgery</b>               |             |              | <b>&lt; 0.001</b> |
| Orthopedic                           | 1 (4.55%)   | 72 (18.41%)  |                   |
| Hepatobiliary                        | 4 (18.18%)  | 112 (28.64%) |                   |
| Gastrointestinal                     | 3 (13.64%)  | 149 (38.11%) |                   |
| Pancreatic                           | 6 (27.27%)  | 36 (9.21%)   |                   |
| Thoracic                             | 8 (36.36%)  | 22 (5.63%)   |                   |
| Open surgery                         | 13 (59.09%) | 276 (70.59%) | 0.252             |
| Endoscopy surgery                    | 9 (40.91%)  | 115 (29.41%) |                   |
| Surgery time (min)                   | 239 ± 101   | 188 ± 89     | 0.480             |
| Anesthesia time (min)                | 309 ± 106   | 261 ± 102    | 0.722             |

Values are expressed as the mean ± SD or as numbers (percent).

ASA, American Society of Anesthesiologists; COPD, chronic obstructive pulmonary disease; MET, metabolic equivalent; NYHA: New York Heart Association.

**Supplementary table 3.** The comparison of preoperative PCT, CRP, hsCRP and Scr concentrations between positive and negative patients with AKI and POD.

| <b>Variable</b>                | <b>Positive patients</b>  | <b>Negative patients</b>  | <b>P value</b> |
|--------------------------------|---------------------------|---------------------------|----------------|
| <b>AKI</b>                     | (n = 7)                   | (n = 406)                 |                |
| Scr ( $\mu\text{mol L}^{-1}$ ) | 79.00 (66.00 to 99.00)    | 75.00 (63.00 to 86.00)    | 0.348          |
| PCT ( $\text{ng mL}^{-1}$ )    | 0.05 (0.05 to 0.05)       | 0.05 (0.05 to 0.05)       | 0.898          |
| CRP ( $\text{mg L}^{-1}$ )     | 2.50 (2.50 to 2.50)       | 2.50 (2.50 to 2.50)       | 0.817          |
| hsCRP ( $\text{mg L}^{-1}$ )   | 1.10 (0.25 to 4.70)       | 1.20 (0.25 to 3.63)       | 0.978          |
| Scr · PCT                      | 3.95 (3.30 to 4.95)       | 3.90 (3.25 to 4.65)       | 0.715          |
| Scr · CRP                      | 227.50 (165.00 to 280.00) | 202.50 (167.50 to 258.13) | 0.677          |
| Scr · hsCRP                    | 72.60 (24.75 to 395.00)   | 90.00 (22.00 to 260.25)   | 0.742          |
| <b>POD</b>                     | (n = 10)                  | (n = 403)                 |                |
| Scr ( $\mu\text{mol L}^{-1}$ ) | 76.00 (63.50 to 79.50)    | 75.00 (63.00 to 87.00)    | 0.733          |
| PCT ( $\text{ng mL}^{-1}$ )    | 0.05 (0.05 to 0.07)       | 0.05 (0.05 to 0.05)       | 0.416          |
| CRP ( $\text{mg L}^{-1}$ )     | 2.50 (2.50 to 11.78)      | 2.50 (2.50 to 2.50)       | 0.344          |
| hsCRP ( $\text{mg L}^{-1}$ )   | 2.90 (0.25 to 4.10)       | 1.20 (0.25 to 3.60)       | 0.421          |
| Scr · PCT                      | 3.93 (3.39 to 7.16)       | 3.90 (3.25 to 4.65)       | 0.581          |
| Scr · CRP                      | 192.50 (169.38 to 943.80) | 202.50 (167.50 to 257.50) | 0.884          |
| Scr · hsCRP                    | 212.10 (28.50 to 271.70)  | 85.80 (22.00 to 260.00)   | 0.480          |

Values are expressed as median (interquartile range).

AKI, Acute kidney injury; CRP, C-reactive protein; hsCRP, high-sensitivity C-reactive protein; PCT, procalcitonin; POD, postoperative delirium; Scr, serum creatinine.

**Supplementary table 4.** The comparisons involved preoperative concentrations of Scr, PCT, CRP, and hsCRP between patients over 75 years old who were positive and negative in terms of ICU admission, cardiovascular events, complications of CDC grade 3 or higher, major complications, or infections.

| <b>Variable</b>                                    | <b>Positive patients</b> | <b>Negative patients</b> | <b>P value</b> |
|----------------------------------------------------|--------------------------|--------------------------|----------------|
| <b>ICU admission</b>                               | (n = 5)                  | (n = 111)                |                |
| Scr ( $\mu\text{mol L}^{-1}$ )                     | 91.00 (85.00, 112.50)    | 76.00 (65.00, 89.00)     | <b>0.020</b>   |
| PCT ( $\text{ng mL}^{-1}$ )                        | 0.05 (0.05, 0.05)        | 0.05 (0.05, 0.05)        | 0.618          |
| CRP ( $\text{mg L}^{-1}$ )                         | 6.00 (2.50, 17.45)       | 2.50 (2.50, 2.50)        | 0.051          |
| hsCRP ( $\text{mg L}^{-1}$ )                       | 2.20 (0.25, 5.00)        | 1.10 (0.25, 3.50)        | 0.358          |
| Scr · PCT                                          | 4.55 (4.25, 5.63)        | 4.00 (3.35, 4.90)        | 0.074          |
| Scr · CRP                                          | 546.00 (238.75, 1518.85) | 210.00 (175.00, 267.50)  | <b>0.006</b>   |
| Scr · hsCRP                                        | 200.20 (28.13, 425.00)   | 85.20 (24.75, 250.00)    | 0.162          |
| <b>Cardiovascular events</b>                       | (n = 8)                  | (n = 108)                |                |
| Scr ( $\mu\text{mol L}^{-1}$ )                     | 84.50 (72.25, 99.25)     | 76.00 (65.00, 89.75)     | 0.121          |
| PCT ( $\text{ng mL}^{-1}$ )                        | 0.05 (0.05, 0.05)        | 0.05 (0.05, 0.05)        | 0.442          |
| CRP ( $\text{mg L}^{-1}$ )                         | 2.50 (2.50, 5.20)        | 2.50 (2.50, 2.50)        | 0.823          |
| hsCRP ( $\text{mg L}^{-1}$ )                       | 1.05 (0.25, 2.50)        | 1.15 (0.25, 3.95)        | 0.634          |
| Scr · PCT                                          | 4.23 (3.61, 4.96)        | 4.03 (3.35, 4.90)        | 0.477          |
| Scr · CRP                                          | 230.00 (182.50, 634.38)  | 213.75 (175.63, 279.38)  | 0.410          |
| Scr x hsCRP                                        | 89.70 (26.56, 198.40)    | 86.15 (25.00, 263.05)    | 0.994          |
| <b>Complications <math>\geq</math> CDC grade 3</b> | (n = 6)                  | (n = 110)                |                |
| Scr ( $\mu\text{mol L}^{-1}$ )                     | 99.50 (71.75, 150.50)    | 76.00 (65.75, 89.00)     | 0.059          |
| PCT ( $\text{ng mL}^{-1}$ )                        | 0.05 (0.05, 0.05)        | 0.05 (0.05, 0.05)        | 0.336          |
| CRP ( $\text{mg L}^{-1}$ )                         | 2.50 (2.50, 11.78)       | 2.50 (2.50, 2.50)        | 0.456          |
| hsCRP ( $\text{mg L}^{-1}$ )                       | 0.48 (0.25, 3.28)        | 1.20 (0.25, 3.85)        | 0.405          |
| Scr · PCT                                          | 4.98 (3.59, 7.53)        | 4.03 (3.43, 4.81)        | 0.239          |
| Scr · CRP                                          | 408.75 (216.88, 1140.68) | 211.25 (175.00, 270.00)  | 0.089          |
| Scr · hsCRP                                        | 83.13 (24.94, 217.93)    | 86.15 (25.50, 257.15)    | 0.965          |
| <b>Major complications</b>                         | (n = 38)                 | (n = 78)                 |                |
| Scr ( $\mu\text{mol L}^{-1}$ )                     | 77.50 (69.75, 91.00)     | 77.50 (63.00, 89.25)     | 0.413          |

|                             |                          |                         |       |
|-----------------------------|--------------------------|-------------------------|-------|
| PCT (ng mL <sup>-1</sup> )  | 0.05 (0.05, 0.05)        | 0.05 (0.05, 0.05)       | 0.308 |
| CRP (mg L <sup>-1</sup> )   | 2.50 (2.50, 2.50)        | 2.50 (2.50, 2.50)       | 0.748 |
| hsCRP (mg L <sup>-1</sup> ) | 1.70 (0.51, 3.58)        | 0.95 (0.25, 4.40)       | 0.334 |
| Scr · PCT                   | 4.10 (3.49, 4.86)        | 4.03 (3.29, 4.96)       | 0.834 |
| Scr · CRP                   | 213.75 (175.00, 303.25)  | 215.00 (177.50, 286.25) | 0.954 |
| Scr · hsCRP                 | 125.70 (38.86, 292.85)   | 61.60 (24.31, 238.00)   | 0.164 |
| <b>Infection</b>            | (n = 26)                 | (n = 90)                |       |
| Scr (µmol L <sup>-1</sup> ) | 77.50 (69.75, 90.25)     | 77.50 (64.75, 90.25)    | 0.579 |
| PCT (ng mL <sup>-1</sup> )  | 0.05 (0.05, 0.05)        | 0.05 (0.05, 0.05)       | 0.882 |
| CRP (mg L <sup>-1</sup> )   | 2.50 (2.50, 6.18)        | 2.50 (2.50, 2.50)       | 0.580 |
| hsCRP (mg L <sup>-1</sup> ) | 1.85 (0.25, 4.25)        | 1.00 (0.25, 3.58)       | 0.338 |
| Scr · PCT                   | 4.13 (3.49, 4.96)        | 4.03 (3.35, 4.86)       | 0.648 |
| Scr · CRP                   | 221.25 (176.88, 450.38)  | 213.75 (175.00, 278.12) | 0.566 |
| Scr · hsCRP                 | 124.30 (29.69, 324.15)   | 82.05 (24.69, 223.50)   | 0.212 |
| <b>AKI</b>                  | (n = 5)                  | (n = 111)               |       |
| Scr (µmol L <sup>-1</sup> ) | 79.00 (67.50, 95.00)     | 77.00 (65.00, 90.00)    | 0.744 |
| PCT (ng mL <sup>-1</sup> )  | 0.05 (0.05, 0.05)        | 0.05 (0.05, 0.05)       | 0.618 |
| CRP (mg L <sup>-1</sup> )   | 2.50 (2.50, 15.65)       | 2.50 (2.50, 2.50)       | 0.800 |
| hsCRP (mg L <sup>-1</sup> ) | 1.10 (0.43, 3.60)        | 1.20 (0.25, 3.80)       | 0.962 |
| Scr · PCT                   | 3.95 (3.38, 4.75)        | 4.05 (3.45, 4.90)       | 0.825 |
| Scr · CRP                   | 227.50 (168.75, 1261.35) | 215.00 (177.50, 280.00) | 0.872 |
| Scr · hsCRP                 | 72.60 (33.08, 297.60)    | 87.10 (25.00, 254.20)   | 0.835 |
| <b>POCD</b>                 | (n = 6)                  | (n = 110)               |       |
| Scr (µmol L <sup>-1</sup> ) | 76.00 (63.50, 90.50)     | 78.50 (65.75, 90.25)    | 0.763 |
| PCT (ng mL <sup>-1</sup> )  | 0.05 (0.05, 0.07)        | 0.05 (0.05, 0.05)       | 0.840 |
| CRP (mg L <sup>-1</sup> )   | 2.50 (2.50, 11.78)       | 2.50 (2.50, 2.50)       | 0.456 |
| hsCRP (mg L <sup>-1</sup> ) | 2.40 (0.25, 4.10)        | 1.10 (0.25, 3.63)       | 0.730 |
| Scr · PCT                   | 3.88 (3.18, 7.16)        | 4.05 (3.45, 4.90)       | 0.920 |
| Scr · CRP                   | 190.00 (158.75, 1140.68) | 215.00 (176.88, 278.13) | 0.791 |
| Scr · hsCRP                 | 176.55 (26.75, 315.35)   | 84.60 (24.94, 238.00)   | 0.664 |

Values are expressed as median (interquartile range).

CDC, Clavien-Dindo Classification; CRP, C-reactive protein; hsCRP, high-sensitivity C-reactive protein; ICU, intensive care unit; PCT, procalcitonin; Scr,

serum creatinine.
